# Supplementary material
Source: PubMed Central journal article supplement (PMC7011664)

Supplemental Figure for:  
CIC-mutation as a molecular mechanism of acquired resistance to combined BRAF/MEK inhibition in extramedullary Multiple Myeloma with CNS involvement.  
K. Martin Kortüm et al.

**Supplementary Figure S1:** Heatmap of BRAF mutation in M3P sequenced cohort [2, 7, 13].

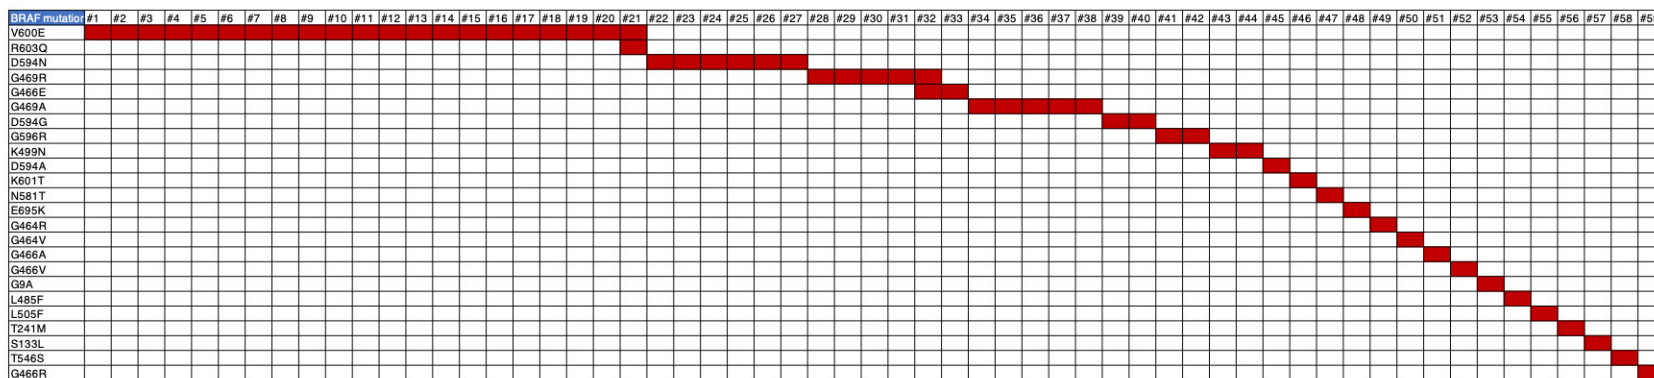

Supplement: ONCO-25-112-s001.pdf [file ONCO-25-112-s001.pdf]
